# Supplementary material for: Wolbachia detection in Aedes aegypti using MALDI-TOF MS coupled to artificial intelligence
Source: PubMed Central journal article supplement (PMC8560810; doi:10.1038/s41598-021-00888-1), 2021-11-01
Supplement: 41598_2021_888_MOESM1_ESM.pdf [file 41598_2021_888_MOESM1_ESM.pdf]

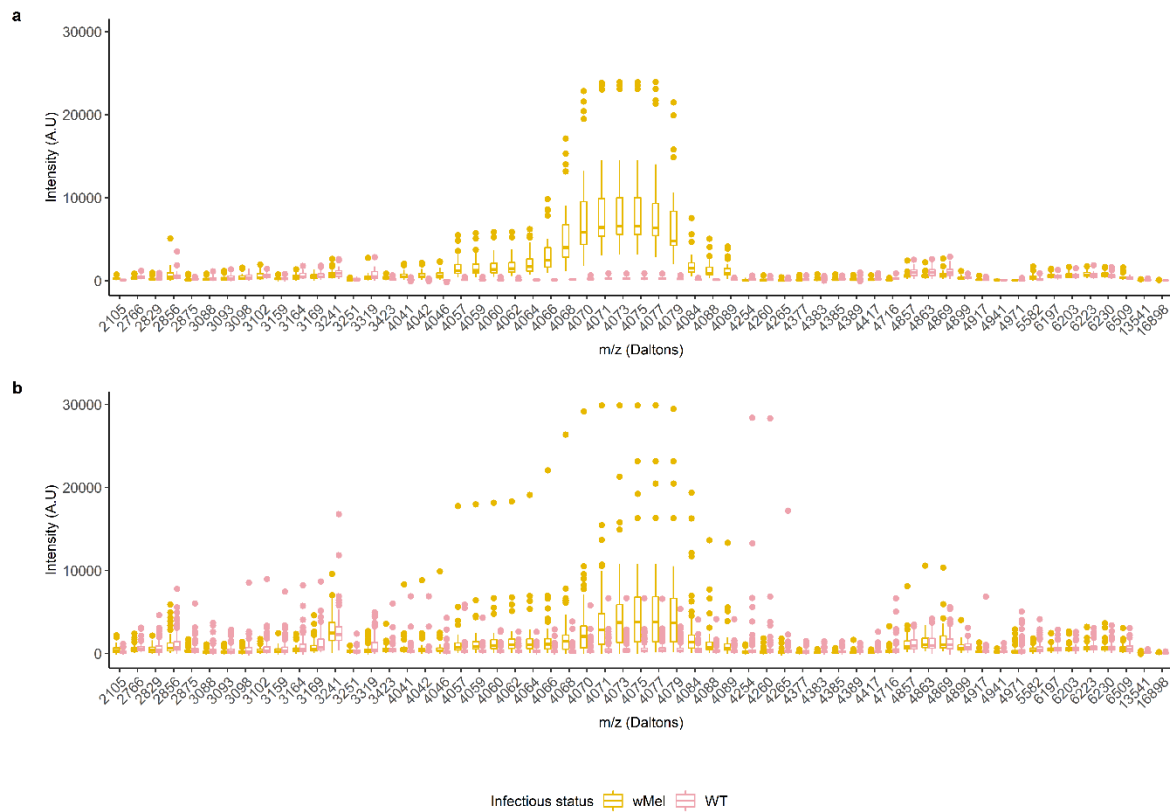

**Supplementary Figure S1. Boxplot showing the 60 mass points of distinct m/z (Daltons) considered over 80% by the CNN to discriminate *Ae. aegypti* infected and uninfected with *Wolbachia*.** a: results obtained for laboratory-reared mosquitoes (wMel: n = 30; WT: n = 30). b: results obtained for field mosquitoes (wMel: n = 56; WT: n = 138). The boxplot colors correspond to the infection status of the mosquitoes determined by qPCR (yellow: wMel; pink: WT). Abbreviations: A.U, arbitrary unity; m/z, mass-to-charge ratio.
