# Supplementary material for: Wolbachia detection in Aedes aegypti using MALDI-TOF MS coupled to artificial intelligence
Source: PubMed Central journal article supplement (PMC8560810; doi:10.1038/s41598-021-00888-1), 2021-11-01
Supplement: 41598_2021_888_MOESM3_ESM.pdf [file 41598_2021_888_MOESM3_ESM.pdf]

|                                                                  | MALDI-TOF | qPCR     | LAMP      |
|------------------------------------------------------------------|-----------|----------|-----------|
| Machine' cost                                                    | 170,000 € | 5,000 €  | 3,000 €   |
| Cost of reagent and consumable for 1 sample                      | 0.61 €    | 1.43 €   | 2.29 €    |
| Amortized machine' cost over 5 years (a)                         | 34,000 €  | 1,000 €  | 600 €     |
| Annual cost of reagent and consumable; for 60,000 mosquitoes (b) | 36,807 €  | 85,714 € | 137,143 € |
| Total annual cost (a + b)                                        | 70,807 €  | 86,714 € | 137,743 € |

**Supplementary table S2. Detail on the annual cost of diagnosing field-mosquitoes using the 3 techniques.** The estimated number of mosquitoes (*i.e.*, 60,000) is based on the approximate number of mosquitoes analyzed in New Caledonia per year. Costs are based on prices in New Caledonia.
